# Supplementary material for: The effect of cation size on structure and properties of Ba-based tetragonal tungsten bronzes Ba4M2Nb10O30 (M = Na, K or Rb) and Ba4M2Nb8Ti2O30 (M = Ca or Sr)
Source: Royal Society of Chemistry journal article supplement (doi:10.1039/d3cp05666j), 2023-12-29
Supplement: d3cp05666j1.pdf [file d3cp05666j1.pdf]

**Supporting info:** The effect of cation size on structure and properties of Ba-based tetragonal tungsten bronzes  $\text{Ba}_4\text{M}_2\text{Nb}_{10}\text{O}_{30}$  ( $\text{M}=\text{Na}$ ,  $\text{K}$  or  $\text{Rb}$ ) and  $\text{Ba}_4\text{M}_2\text{Ti}_2\text{Nb}_8\text{O}_{30}$  ( $\text{M}=\text{Ca}$  or  $\text{Sr}$ ).

Nora Ståle Løndal, Benjamin Albert Dobson Williamson, Julian Walker, Mari-Ann Einarsrud and Tor Grande

Department of Materials Science and Engineering  
NTNU Norwegian University of Science and Technology, NO-7491 Trondheim, Norway

### Rietveld refinement

Table S1. The details for Rietveld refinement of occupancy for the BMN and BMNT TTB powder samples. For the *Amm2* and *Cmm2* structure A2, B1 and B2 sites are split in two, while for the *P4bm* structure these are combined.

| Site | Atom | Occupancy    |
|------|------|--------------|
| A2_1 | Ba   | $1-(1-xA)/2$ |
|      | M    | $(1-xA)/2$   |
| A2_2 | Ba   | $1-(1-xA)/2$ |
|      | M    | $(1-xA)/2$   |
| A1   | M    | $xA$         |
|      | Ba   | $1-xA$       |
| B2_1 | Nb   | $1-(1-xB)/4$ |
|      | Ti   | $(1-xB)/4$   |
| B2_2 | Nb   | $1-(1-xB)/4$ |
|      | Ti   | $(1-xB)/4$   |
| B1_1 | Ti   | $xB$         |
|      | Nb   | $1-xB$       |
| B1_2 | Ti   | $xB$         |
|      | Nb   | $1-xB$       |

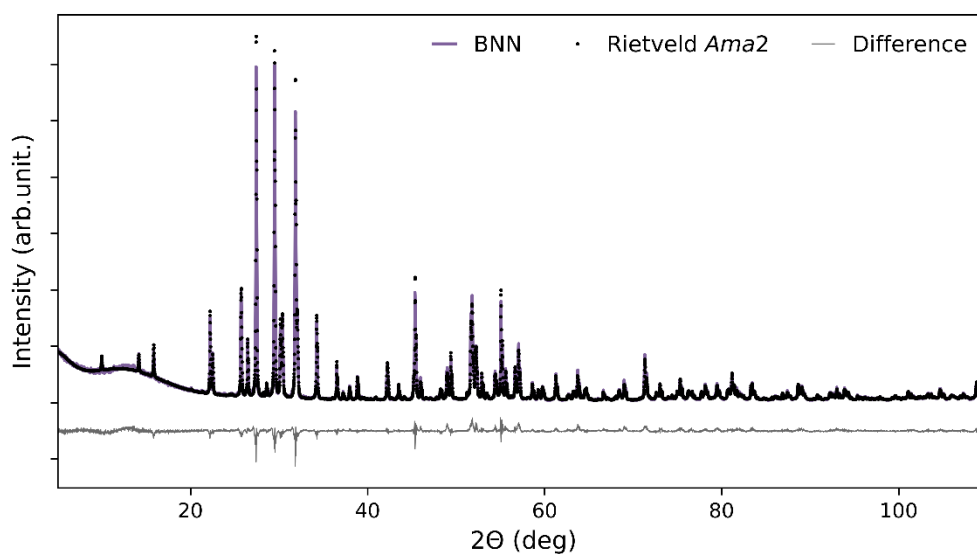

Figure S1: X-ray diffractogram BNN with Rietveld refinement towards *Ama2* space group.

Table S2. Refined *Ama2* crystal structure of Ba<sub>4</sub>Na<sub>2</sub>Nb<sub>10</sub>O<sub>30</sub>. The number of independent parameters that were refined was 167. Unit cell parameters: a = 17.63258(18) Å, b = 35.2036(4) Å and c = 7.98157(7) Å. GOF: 2.08, Rwp: 9.48. Refined parameters are in **bold**.

| Site | M <sub>p</sub> | Atom | X                 | Y                 | Z                 | Occupancy       | B <sub>eq</sub> |
|------|----------------|------|-------------------|-------------------|-------------------|-----------------|-----------------|
| A2_1 | 8              | Ba   | <b>0.9218(12)</b> | <b>0.8728(11)</b> | <b>0.239(5)</b>   | <b>0.942(2)</b> | 0.44            |
|      |                | Na   |                   |                   |                   | <b>0.058(2)</b> | 0.44            |
| A2_2 | 8              | Ba   | <b>0.0775(12)</b> | <b>0.6224(10)</b> | <b>0.237(5)</b>   | <b>0.942(2)</b> | 0.44            |
|      |                | Na   |                   |                   |                   | <b>0.058(2)</b> | 0.44            |
| A2_3 | 4              | Ba   | 0.25000           | <b>0.9613(13)</b> | <b>0.248(10)</b>  | <b>0.942(2)</b> | 0.44            |
|      |                | Na   |                   |                   |                   | <b>0.942(2)</b> | 0.44            |
| A2_4 | 4              | Ba   | 0.75000           | <b>0.5392(13)</b> | <b>0.246(9)</b>   | <b>0.942(2)</b> | 0.44            |
|      |                | Na   |                   |                   |                   | <b>0.058(2)</b> | 0.44            |
| A2_5 | 4              | Ba   | 0.25000           | <b>0.7883(13)</b> | <b>0.246(10)</b>  | <b>0.942(2)</b> | 0.44            |
|      |                | Na   |                   |                   |                   | <b>0.058(2)</b> | 0.44            |
| A2_6 | 4              | Ba   | 0.75000           | <b>0.7115(13)</b> | <b>0.250(9)</b>   | <b>0.942(2)</b> | 0.44            |
|      |                | Na   |                   |                   |                   | <b>0.058(2)</b> | 0.44            |
| A1_1 | 8              | Na   | <b>0.503(5)</b>   | <b>0.7462(16)</b> | <b>0.249(19)</b>  | <b>0.885(5)</b> | 1.6             |
|      |                | Ba   |                   |                   |                   | <b>0.115(5)</b> | 1.6             |
| A1_2 | 4              | Na   | 0.00000           | 0.00000           | <b>0.24(3)</b>    | <b>0.885(5)</b> | 1.6             |
|      |                | Ba   |                   |                   |                   | <b>0.115(5)</b> | 1.6             |
| A1_3 | 4              | Na   | 0.00000           | 0.50000           | <b>0.280(12)</b>  | <b>0.885(5)</b> | 1.6             |
|      |                | Ba   |                   |                   |                   | <b>0.115(5)</b> | 1.6             |
| B1_1 | 4              | Nb   | 0.75000           | <b>0.125(4)</b>   | 0.00000           | 1               | 0.42            |
| B1_2 | 4              | Nb   | 0.25000           | <b>0.375(3)</b>   | 0.00000           | 1               | 0.42            |
| B1_3 | 4              | Nb   | 0.75000           | <b>0.875(4)</b>   | 0.00000           | 1               | 0.42            |
| B1_4 | 4              | Nb   | 0.25000           | <b>0.625(4)</b>   | 0.00000           | 1               | 0.42            |
| B2_1 | 8              | Nb   | <b>0.642(4)</b>   | <b>0.784(3)</b>   | <b>-0.001(8)</b>  | 1               | 0.42            |
| B2_2 | 8              | Nb   | <b>0.358(5)</b>   | <b>0.716(2)</b>   | <b>-0.002(7)</b>  | 1               | 0.42            |
| B2_3 | 8              | Nb   | <b>0.858(5)</b>   | <b>0.966(2)</b>   | <b>-0.002(7)</b>  | 1               | 0.42            |
| B2_4 | 8              | Nb   | <b>0.142(5)</b>   | <b>0.534(2)</b>   | <b>0.000(7)</b>   | 1               | 0.42            |
| B2_5 | 8              | Nb   | <b>0.432(4)</b>   | <b>0.821(3)</b>   | <b>0.000(8)</b>   | 1               | 0.42            |
| B2_6 | 8              | Nb   | <b>0.568(5)</b>   | <b>0.679(3)</b>   | <b>-0.001(7)</b>  | 1               | 0.42            |
| B2_7 | 8              | Nb   | <b>0.068(5)</b>   | <b>0.929(2)</b>   | <b>0.000(8)</b>   | 1               | 0.42            |
| B2_8 | 8              | Nb   | <b>0.932(5)</b>   | <b>0.571(2)</b>   | <b>-0.001(7)</b>  | 1               | 0.42            |
| O1_1 | 8              | O    | <b>0.031(10)</b>  | <b>0.88(2)</b>    | <b>-0.02(3)</b>   | 1               | 1.17            |
| O1_2 | 8              | O    | <b>0.968(11)</b>  | <b>0.625(17)</b>  | <b>-0.058(15)</b> | 1               | 1.17            |
| O1_3 | 4              | O    | 0.25000           | <b>0.01(2)</b>    | <b>-0.01(5)</b>   | 1               | 1.17            |
| O1_4 | 4              | O    | 0.75000           | <b>0.49(2)</b>    | <b>-0.02(5)</b>   | 1               | 1.17            |
| O1_5 | 4              | O    | 0.25000           | <b>0.24(2)</b>    | <b>-0.02(6)</b>   | 1               | 1.17            |
| O1_6 | 4              | O    | 0.75000           | <b>0.26(2)</b>    | <b>-0.01(6)</b>   | 1               | 1.17            |
| O2_1 | 8              | O    | <b>0.61(3)</b>    | <b>0.231(14)</b>  | <b>-0.01(4)</b>   | 1               | 1.17            |
| O2_2 | 8              | O    | <b>0.39(4)</b>    | <b>0.269(14)</b>  | <b>-0.02(3)</b>   | 1               | 1.17            |
| O2_3 | 8              | O    | <b>0.893(6)</b>   | <b>0.023(4)</b>   | <b>-0.141(13)</b> | 1               | 1.17            |
| O2_4 | 8              | O    | <b>0.11(3)</b>    | <b>0.482(13)</b>  | <b>-0.02(3)</b>   | 1               | 1.17            |
| O2_5 | 8              | O    | <b>0.540(19)</b>  | <b>0.803(8)</b>   | <b>-0.06(3)</b>   | 1               | 1.17            |
| O2_6 | 8              | O    | <b>0.46(2)</b>    | <b>0.694(12)</b>  | <b>-0.02(4)</b>   | 1               | 1.17            |
| O2_7 | 8              | O    | <b>0.964(16)</b>  | <b>0.949(6)</b>   | <b>-0.03(3)</b>   | 1               | 1.17            |
| O2_8 | 8              | O    | <b>0.04(3)</b>    | <b>0.555(15)</b>  | <b>-0.04(4)</b>   | 1               | 1.17            |
| O3_1 | 8              | O    | <b>0.68(3)</b>    | <b>0.166(15)</b>  | <b>-0.02(3)</b>   | 1               | 1.17            |
| O3_2 | 8              | O    | <b>0.32(3)</b>    | <b>0.335(18)</b>  | <b>-0.03(3)</b>   | 1               | 1.17            |

|      |   |   |                  |                  |                 |   |      |
|------|---|---|------------------|------------------|-----------------|---|------|
| O3_3 | 8 | O | <b>0.82(3)</b>   | <b>0.085(17)</b> | <b>-0.02(4)</b> | 1 | 1.17 |
| O3_4 | 8 | O | <b>0.18(3)</b>   | <b>0.415(16)</b> | <b>0.00(4)</b>  | 1 | 1.17 |
| O3_5 | 8 | O | <b>0.668(17)</b> | <b>0.838(8)</b>  | <b>-0.05(2)</b> | 1 | 1.17 |
| O3_6 | 8 | O | <b>0.33(3)</b>   | <b>0.662(15)</b> | <b>0.01(4)</b>  | 1 | 1.17 |
| O3_7 | 8 | O | <b>0.83(3)</b>   | <b>0.911(14)</b> | <b>0.01(4)</b>  | 1 | 1.17 |
| O3_8 | 8 | O | <b>0.17(3)</b>   | <b>0.589(14)</b> | <b>0.01(3)</b>  | 1 | 1.17 |
| O4_1 | 8 | O | <b>0.869(12)</b> | <b>0.794(4)</b>  | <b>0.24(5)</b>  | 1 | 1.17 |
| O4_2 | 8 | O | <b>0.145(11)</b> | <b>0.727(5)</b>  | <b>0.24(6)</b>  | 1 | 1.17 |
| O4_3 | 8 | O | <b>0.655(9)</b>  | <b>0.974(5)</b>  | <b>0.24(5)</b>  | 1 | 1.17 |
| O4_4 | 8 | O | <b>0.366(13)</b> | <b>0.539(4)</b>  | <b>0.25(6)</b>  | 1 | 1.17 |
| O4_5 | 8 | O | <b>0.413(9)</b>  | <b>0.936(4)</b>  | <b>0.24(5)</b>  | 1 | 1.17 |
| O4_6 | 8 | O | <b>0.546(9)</b>  | <b>0.573(5)</b>  | <b>0.25(5)</b>  | 1 | 1.17 |
| O4_7 | 8 | O | <b>0.076(10)</b> | <b>0.818(5)</b>  | <b>0.24(5)</b>  | 1 | 1.17 |
| O4_8 | 8 | O | <b>0.941(10)</b> | <b>0.675(5)</b>  | <b>0.25(5)</b>  | 1 | 1.17 |
| O5_1 | 4 | O | 0.75000          | <b>0.867(7)</b>  | <b>0.24(6)</b>  | 1 | 1.17 |
| O5_2 | 4 | O | 0.25000          | <b>0.611(5)</b>  | <b>0.24(7)</b>  | 1 | 1.17 |
| O6_1 | 4 | O | 0.75000          | <b>0.114(7)</b>  | <b>0.24(6)</b>  | 1 | 1.17 |
| O6_2 | 4 | O | 0.25000          | <b>0.366(7)</b>  | <b>0.25(5)</b>  | 1 | 1.17 |

Table S3. Refined *Cmm2* crystal structure of Ba<sub>4</sub>Ca<sub>2</sub>Nb<sub>8</sub>Ti<sub>2</sub>O<sub>30</sub>. The number of independent parameters that were refined was 62. Unit cell parameters: a = 17.5251(5) Å, b = 17.5495(5) Å and c = 3.95286(7) Å. GOF: 2.01, Rwp: 11.46. Refined parameters are in **bold**.

| Site | M <sub>p</sub> | Atom | X                 | Y                 | Z                 | Occupancy        | B <sub>eq</sub> |
|------|----------------|------|-------------------|-------------------|-------------------|------------------|-----------------|
| A2_1 | 4              | Ba   | <b>0.1718(4)</b>  | 0.50000           | 0.50000           | <b>0.959(3)</b>  | 0.44            |
|      |                | Ca   |                   |                   |                   | <b>0.041(3)</b>  | 0.44            |
| A2_2 | 4              | Ba   | 0.50000           | <b>0.6712(4)</b>  | 0.50000           | <b>0.959(3)</b>  | 0.44            |
|      |                | Ca   |                   |                   |                   | <b>0.041(3)</b>  | 0.44            |
| A1   | 4              | Ca   | 0.75000           | 0.25000           | <b>0.443(4)</b>   | <b>0.918(7)</b>  | 1.6             |
|      |                | Ba   |                   |                   |                   | <b>0.082(7)</b>  | 1.6             |
| B1_1 | 2              | Nb   | 0.00000           | 0.00000           | <b>0.966(10)</b>  | <b>0.702(14)</b> | 0.42            |
|      |                | Ti   |                   |                   |                   | <b>0.298(14)</b> | 0.42            |
| B1_2 | 2              | Nb   | 0.00000           | 0.50000           | <b>0.969(9)</b>   | <b>0.702(14)</b> | 0.42            |
|      |                | Ti   |                   |                   |                   | <b>0.298(14)</b> | 0.42            |
| B2_1 | 8              | Nb   | <b>0.8926(4)</b>  | <b>0.3192(4)</b>  | <b>0.984(5)</b>   | <b>0.825(4)</b>  | 0.42            |
|      |                | Ti   |                   |                   |                   | <b>0.175(4)</b>  | 0.42            |
| B2_2 | 8              | Nb   | <b>0.6807(4)</b>  | <b>0.3923(4)</b>  | <b>0.972(4)</b>   | <b>0.825(4)</b>  | 0.42            |
|      |                | Ti   |                   |                   |                   | <b>0.175(4)</b>  | 0.42            |
| O1_1 | 4              | O    | <b>0.275(4)</b>   | 0.50000           | <b>0.01(3)</b>    | 1                | 1.17            |
| O1_2 | 4              | O    | 0.50000           | <b>0.782(4)</b>   | <b>-0.065(15)</b> | 1                | 1.17            |
| O2_1 | 8              | O    | <b>0.8498(19)</b> | <b>0.215(2)</b>   | <b>0.02(2)</b>    | 1                | 1.17            |
| O2_2 | 8              | O    | <b>0.791(3)</b>   | <b>0.358(2)</b>   | <b>0.156(9)</b>   | 1                | 1.17            |
| O3_1 | 8              | O    | <b>0.924(3)</b>   | <b>0.080(3)</b>   | <b>0.01(2)</b>    | 1                | 1.17            |
| O3_2 | 8              | O    | <b>0.918(3)</b>   | <b>0.430(3)</b>   | <b>0.068(10)</b>  | 1                | 1.17            |
| O4_1 | 8              | O    | <b>0.1033(16)</b> | <b>0.2954(14)</b> | <b>0.48(3)</b>    | 1                | 1.17            |
| O4_2 | 8              | O    | <b>0.6663(15)</b> | <b>0.6234(16)</b> | <b>0.49(2)</b>    | 1                | 1.17            |
| O5_1 | 2              | O    | 0.00000           | 0.50000           | <b>0.40(3)</b>    | 1                | 1.17            |
| O5_2 | 2              | O    | 0.50000           | 0.50000           | <b>0.45(5)</b>    | 1                | 1.17            |

## Dielectric spectroscopy

Table S4. Detailed heating program for impedance spectroscopy of BMN and BMNT materials.

| Compound | Measurement                                  | Heating program                                                                                                                    |
|----------|----------------------------------------------|------------------------------------------------------------------------------------------------------------------------------------|
|          | 1 <sup>st</sup> set 2 <sup>nd</sup> heating: | 30-280 °C (steps of 50 °C), 300-400 °C (every 20 °C)                                                                               |
| BNN      | 2 <sup>nd</sup> set 2 <sup>nd</sup> heating: | 400-520 °C, 580-600 °C (steps of 20 °C) and 520-580 °C (steps of 5 °C)                                                             |
| BKN      | 2 <sup>nd</sup> heating:                     | 30 °C, 50-250 °C (steps of 50 °C), 250-290 °C (steps of 10 °C), 290-330 °C (steps of 2 °C) and 340-360 °C (steps of 20 °C)         |
| BRN      | 2 <sup>nd</sup> heating:                     | 30 °C, 50-200 °C (steps of 50 °C), 200-230 °C, 360-395 (steps of 5 °C) and 230-360 °C (steps of 2 °C)                              |
| BCNT     | 2 <sup>nd</sup> heating:                     | 30-70 °C, 120-400 °C (steps of 10 °C), 70-80 °C, 110-120 °C (steps of 5 °C) and 80-110 °C (steps of 2 °C).                         |
|          | 1 <sup>st</sup> set 1 <sup>st</sup> cycle:   | 25°C, 50-400 (steps of 50 °C), 25°C                                                                                                |
|          | 1 <sup>st</sup> set 2 <sup>nd</sup> heating: | 30, 50-200 (steps of 10 °C), 200-400 (steps of 20 °C)                                                                              |
|          | 1 <sup>st</sup> set 2 <sup>nd</sup> cooling: | 400-25 (steps of 25 °C)                                                                                                            |
| BSNT     | 2 <sup>nd</sup> set 1 <sup>st</sup> cycle:   | 25°C, 50-400 (steps of 50 °C), 25°C                                                                                                |
|          | 2 <sup>nd</sup> set 2 <sup>nd</sup> heating: | 30-70 °C, 120-200 °C (steps of 10 °C), 70-80 °C, 110-120 °C (steps of 5 °C), 80-110 °C (steps of 2 °C) 200-400 °C (steps of 20 °C) |
|          | 2 <sup>nd</sup> set 2 <sup>nd</sup> cooling: | 400-25 (steps of 25 °C)                                                                                                            |

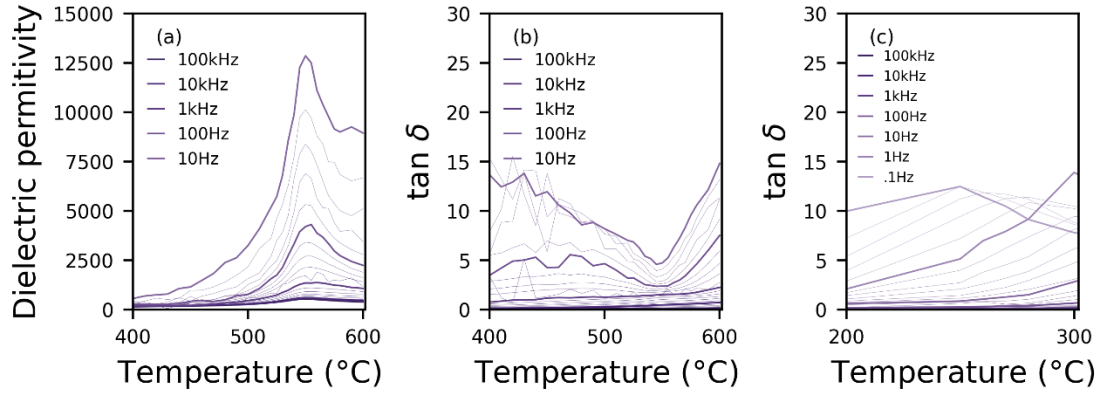

Figure S2: Dielectric spectroscopy data as function of temperature for  $\text{Ba}_4\text{Na}_2\text{Nb}_{10}\text{O}_{30}$ . Dielectric permittivity (a) and  $\tan \delta$  (b) in the frequency range 1-100 kHz between 400 and 600°C displays the ferroelectric transition at 550 °C. A minor feature is present in  $\tan \delta$  in the range 0.1-100 kHz between 200 and 300 °C (c) corresponding to the temperature at which the ferroelastic transition in BNN is expected.

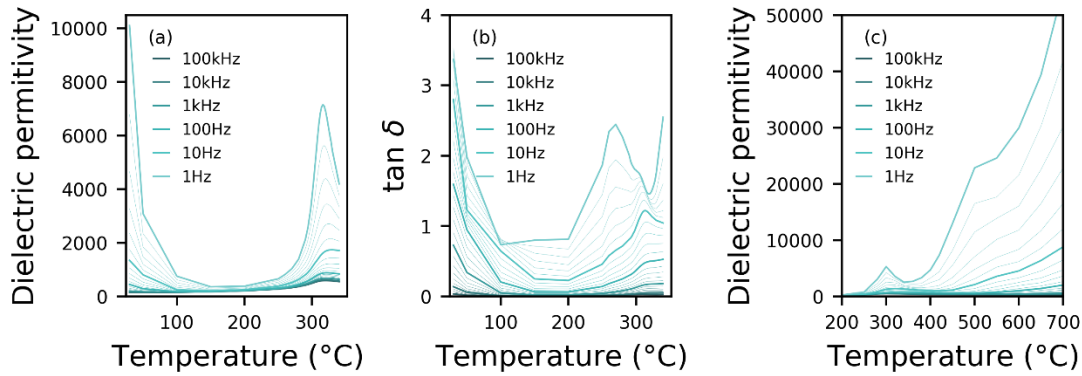

Figure S3: Dielectric spectroscopy data as function of temperature for  $\text{Ba}_4\text{K}_2\text{Nb}_{10}\text{O}_{30}$ . Dielectric permittivity (a) and  $\tan \delta$  (b) in the frequency range 1-100 kHz between 25 and 350°C displays the ferroelectric transition at 320 °C. A second relaxation is present in the dielectric permittivity above the ferroelectric transition at about 500 °C (c).

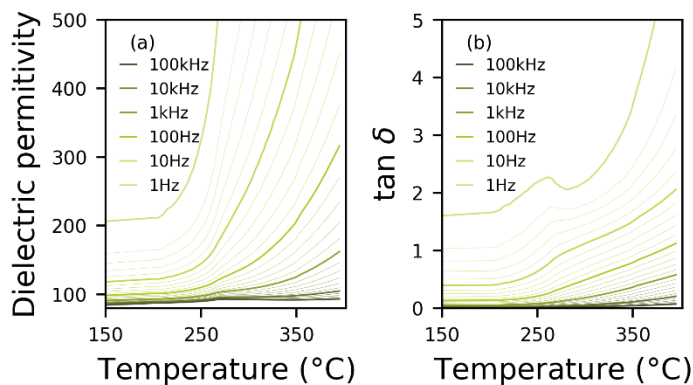

Figure S4: Dielectric spectroscopy data as function of temperature for  $\text{Ba}_4\text{Rb}_2\text{Nb}_{10}\text{O}_{30}$ . Dielectric permittivity (a) and  $\tan \delta$  (b) in the frequency range 1-100 kHz between 150 and 400°C displays the subtle ferroelectric transition at 270 °C.

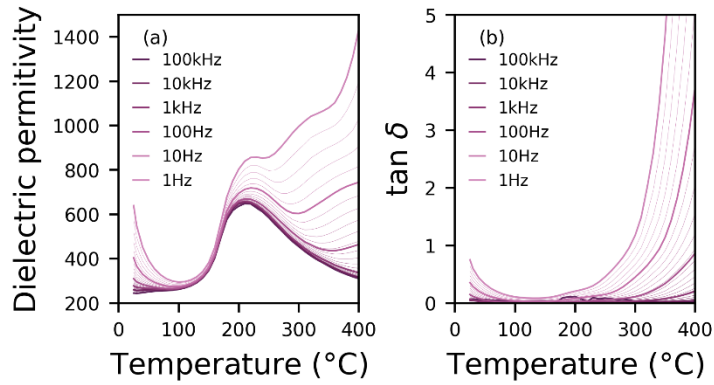

Figure S5: Dielectric spectroscopy data as function of temperature for  $\text{Ba}_4\text{Ca}_2\text{Nb}_8\text{Ti}_2\text{O}_{30}$ . Dielectric permittivity (a) and  $\tan \delta$  (b) in the frequency range 1-100 kHz between 25 and 400  $^{\circ}\text{C}$  displays the ferroelectric transition at 210  $^{\circ}\text{C}$ .

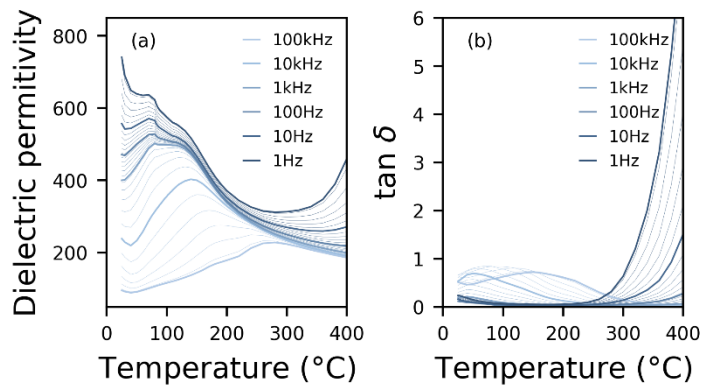

Figure S6: Dielectric spectroscopy data as function of temperature for  $\text{Ba}_4\text{Sr}_2\text{Nb}_8\text{Ti}_2\text{O}_3$ . Dielectric permittivity (a) and  $\tan \delta$  (b) in the frequency range 1-100 kHz between 25 and 400  $^{\circ}\text{C}$  displays a broad frequency dispersion of the peak permittivity.

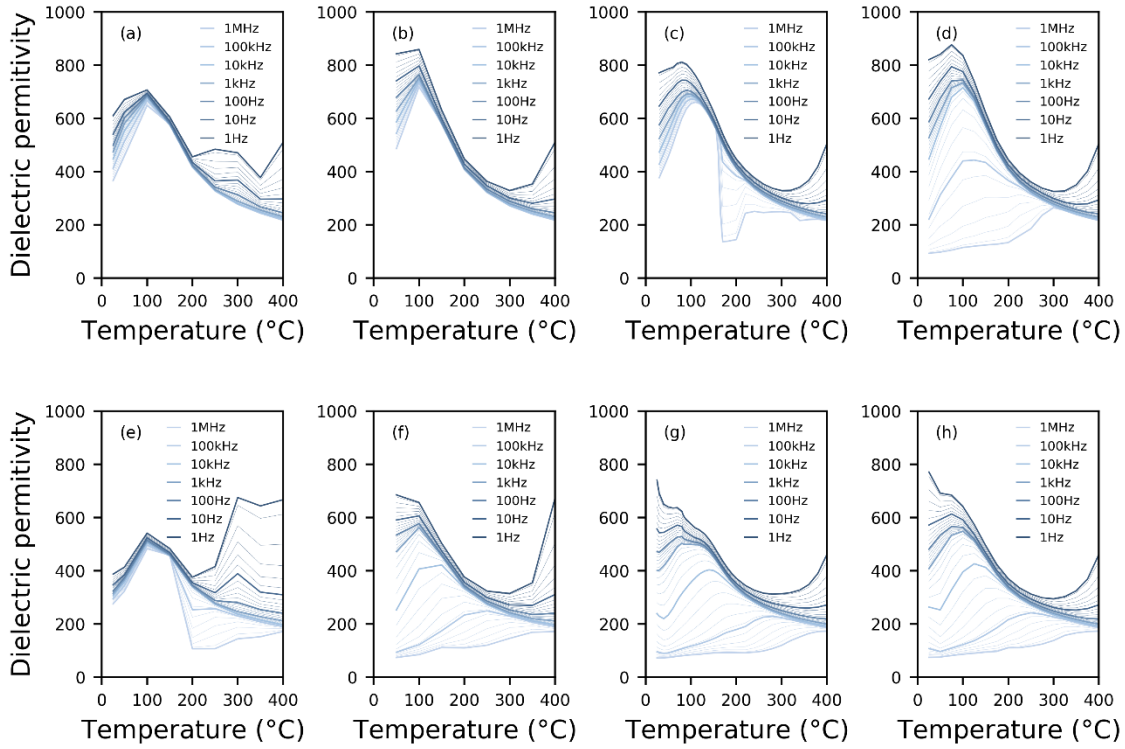

Figure S7: Dielectric permittivity as function of temperature for  $\text{Ba}_4\text{Sr}_2\text{Nb}_8\text{Ti}_2\text{O}_3$ . Dielectric permittivity in the frequency range 1-100 kHz between 25 and 400°C is displayed for the first (a-d) and second (e-h) set of measurements. In each set of measurements, the sample is heated (a, c, e and g) and cooled (b, d, f and h) two consecutive times.

## DSC

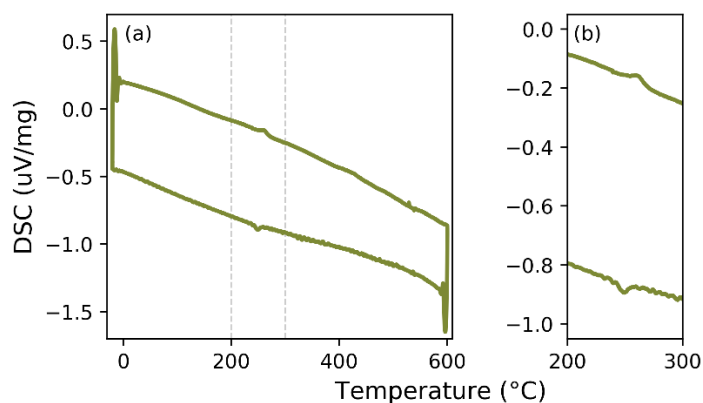

Figure S8: Differential scanning calorimetry as function of temperature for  $\text{Ba}_4\text{Rb}_2\text{Nb}_{10}\text{O}_{30}$ . Endothermic peaks are observed at 250 and 260  $^\circ\text{C}$  on heating and cooling, respectively.

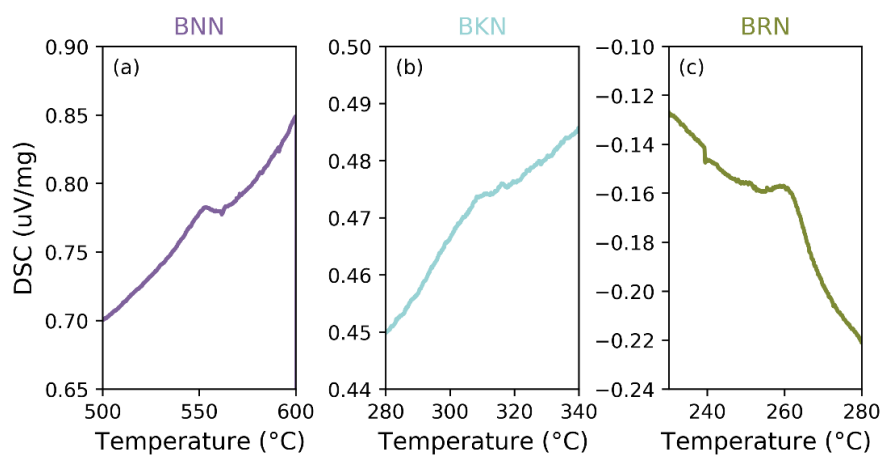

Figure S9: Differential scanning calorimetry as function of temperature. Endothermic peaks are observed for (a)  $\text{Ba}_4\text{Na}_2\text{Nb}_{10}\text{O}_{30}$  at 550  $^\circ\text{C}$ , (b)  $\text{Ba}_4\text{K}_2\text{Nb}_{10}\text{O}_{30}$  at 310  $^\circ\text{C}$  and (c)  $\text{Ba}_4\text{Rb}_2\text{Nb}_{10}\text{O}_{30}$  at 260  $^\circ\text{C}$ .

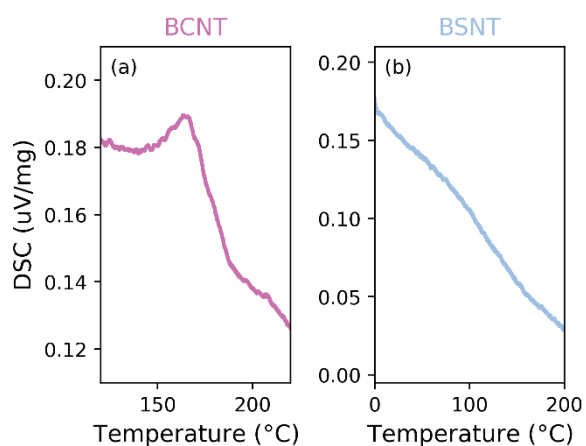

Figure S10: Differential scanning calorimetry as function of temperature. Endothermic peaks are observed for (a)  $\text{Ba}_4\text{Ca}_2\text{Nb}_8\text{Ti}_2\text{O}_{30}$  at 170  $^\circ\text{C}$ , while no peak is observed for (b)  $\text{Ba}_4\text{Sr}_2\text{Nb}_8\text{Ti}_2\text{O}_{30}$ .



### Polarisation- and Strain-Electric Field measurements

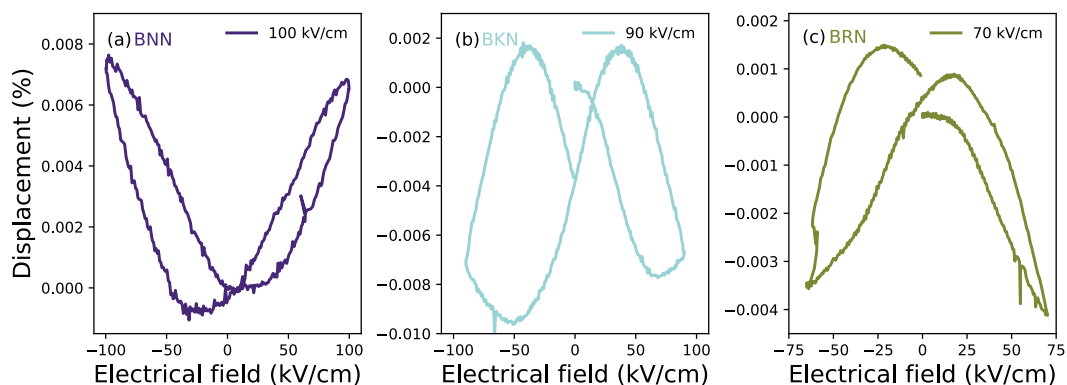

Figure S11: Strain-Electric field loops measured at 100 Hz and ambient temperature on ceramic (a) BNN at 100 kV/cm, (b) BKN 90 kV/cm and (c) BRN at 70 kV/cm.

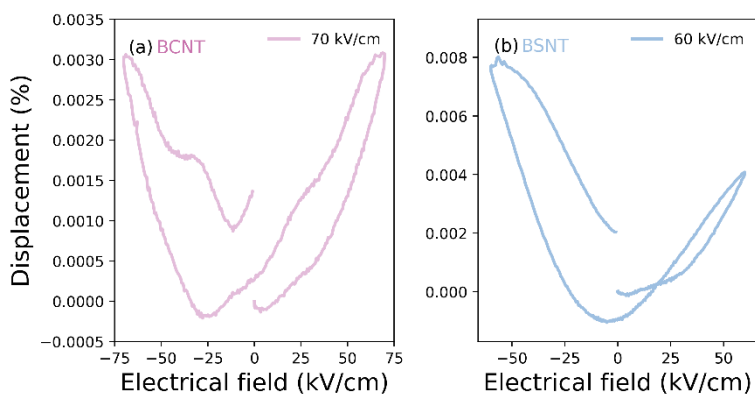

Figure S12: Polarisation-Electric field loops measured at 100 Hz and ambient temperature on ceramic (a) BCNT at 70 kV/cm and (b) BSNT at 60 kV/cm.

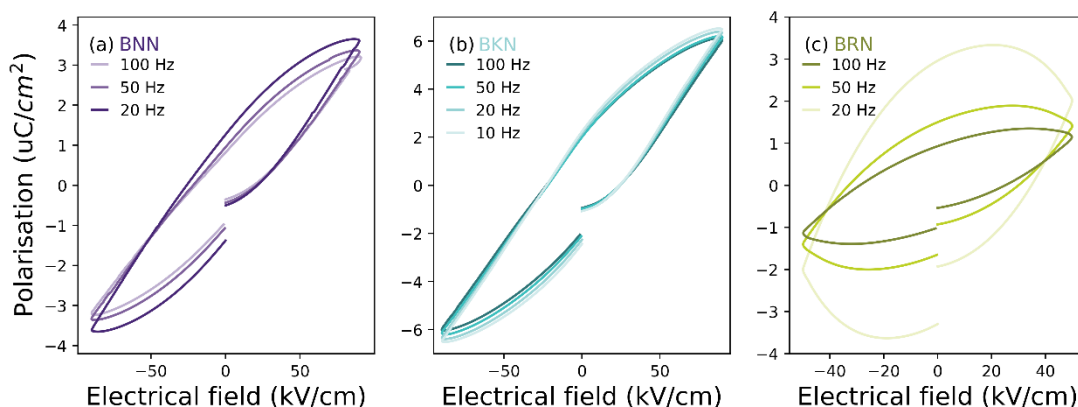

Figure S13: Polarisation-Electric field loops measured between 10-100 Hz and ambient temperature on ceramic (a) BNN at 70 kV/cm, (b) BKN at 70 kV/cm and (c) BRN at 50 kV/cm.

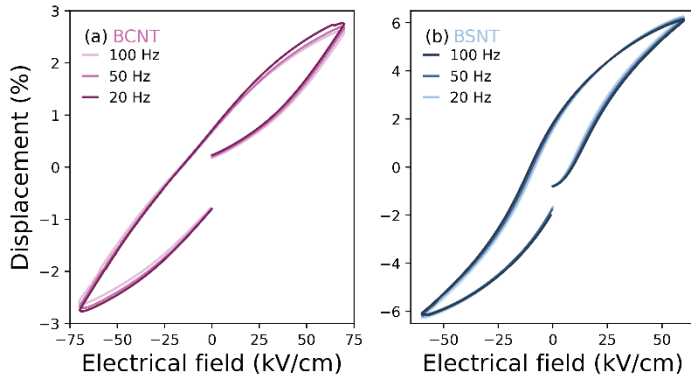

Figure S14: Polarisation-Electric field loops measured between 10-100 Hz and ambient temperature on ceramic (a) BCNT at 70 kV/cm and (b) BSNT at 60 kV/cm.

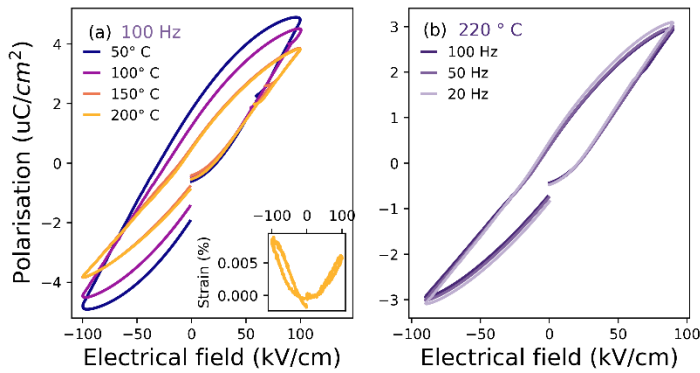

Figure S15: Polarisation-Electric field loops measured on ceramic BNN at (a) 100 Hz and 100 kV/cm at temperatures between 50 and 200 °C (Inset: strain-electric field loop at 200 °C) and (b) between 20-100 Hz at 90 kV/cm and 220 °C.

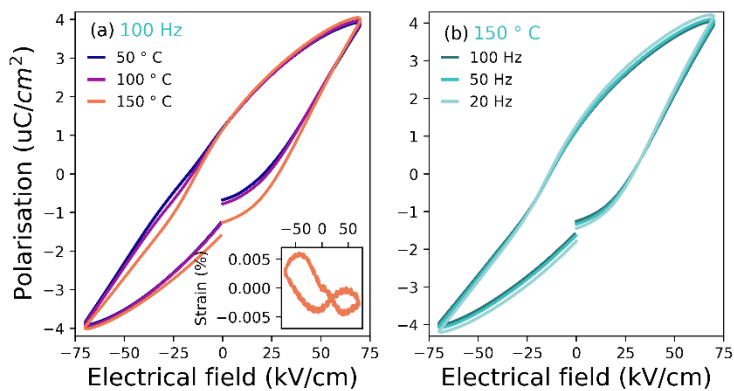

Figure S16: Polarisation-Electric field loops measured on ceramic BKN at (a) 100 Hz and 70 kV/cm at temperatures between 50 and 150 °C (Inset: strain-electric field loop at 150 °C) and (b) between 20-100 Hz at 70 kV/cm and 150 °C.

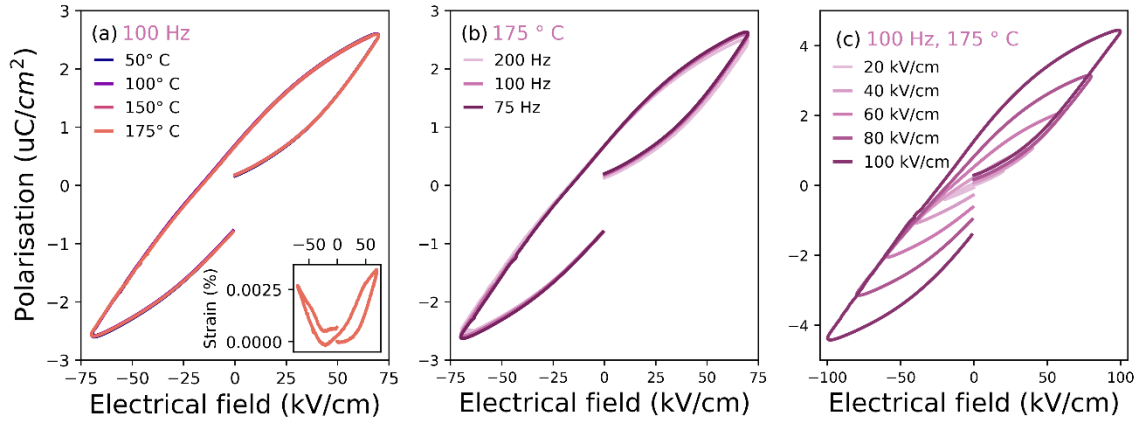

Figure S17: Polarisation-Electric field loops measured on ceramic BCNT at (a) 100 Hz and 100 kV/cm at temperatures between 50 and 175 °C (Inset: strain-electric field loop at 175 °C), (b) between 20-100 Hz at 100 kV/cm and 175 °C and (c) from 20-100 kV/cm at 100Hz and 175 °C.

### Symmetry inequivalent configurations of cation site interchange

Table S5: Symmetry inequivalent configurations and their respective degeneracies in the supercell used for each system (M=Ca, Sr, Ba; R=Na, K, Rb).

| R on A1 Site [%] | symmetry inequivalent configurations | degeneracy |
|------------------|--------------------------------------|------------|
| 100              | 1                                    | 1          |
| 75               | 2                                    | 128        |
| 50               | 3                                    | 336        |
| 25               | 14                                   | 896        |
| 0                | 10                                   | 70         |

### Tabulated Structural Data from DFT

Table S6: Tabulated lattice parameters and Nb-O-Nb bond angles (representing tilting) in the c direction for  $R_2MNb_5O_{15}$  materials with compositions with R=Ca and M=Na, K, Rb in the  $P4/mbm$  space group. The standard deviation in Nb-O-Nb corresponds to the averaged standard deviation of Nb-O-Nb angles within a single cell weighted by the probability of the configuration.

| $R=Ca$<br>( $P4/mbm$ ) | R on A1<br>[%] | a<br>[Å] | b<br>[Å] | c<br>[Å] | <Nb-O-Nb (c)<br>[°] | Std. dev. |
|------------------------|----------------|----------|----------|----------|---------------------|-----------|
| M=Na                   | 0              | 12.38    | 12.30    | 3.81     | 160.98              | 4.90      |
|                        | 25             | 12.43    | 12.29    | 3.80     | 159.51              | 3.80      |
|                        | 50             | 12.47    | 12.17    | 3.81     | 159.71              | 1.61      |
|                        | 75             | 12.21    | 12.47    | 3.79     | 161.59              | 4.54      |
|                        | 100            | 12.65    | 12.65    | 3.91     | 169.22              | 6.23      |
| M=K                    | 0              | 12.40    | 12.50    | 3.81     | 165.42              | 6.03      |
|                        | 25             | 12.33    | 12.50    | 3.81     | 164.91              | 5.83      |
|                        | 50             | 12.56    | 12.62    | 3.87     | 167.13              | 2.08      |
|                        | 75             | 12.42    | 12.46    | 3.82     | 164.27              | 6.36      |
|                        | 100            | 12.40    | 12.40    | 3.90     | 175.34              | 2.33      |
| M=Rb                   | 0              | 12.47    | 12.54    | 3.84     | 168.87              | 6.61      |
|                        | 25             | 12.40    | 12.65    | 3.83     | 167.19              | 5.60      |
|                        | 50             | 12.54    | 12.94    | 3.87     | 166.80              | 1.12      |
|                        | 75             | 12.64    | 12.49    | 3.84     | 163.84              | 5.48      |
|                        | 100            | 12.72    | 12.72    | 3.90     | 169.58              | 6.02      |

Table S7: Tabulated lattice parameters and Nb-O-Nb bond angles (representing tilting) in the c direction for  $R_2MNb_5O_{15}$  materials with compositions with R=Sr and M=Na, K, Rb in the  $P4/mbm$  space group. The standard deviation in Nb-O-Nb corresponds to the averaged standard deviation of Nb-O-Nb angles within a single cell weighted by the probability of the configuration.

| $R=Sr$<br>( $P4/mbm$ ) | R on A1<br>[%] | a<br>[Å] | b<br>[Å] | c<br>[Å] | <Nb-O-Nb (c)<br>[°] | Std. dev. |
|------------------------|----------------|----------|----------|----------|---------------------|-----------|
| M=Na                   | 0              | 12.48    | 12.41    | 3.85     | 166.68              | 4.50      |
|                        | 25             | 12.44    | 12.48    | 3.83     | 165.06              | 3.87      |
|                        | 50             | 12.29    | 12.46    | 3.84     | 162.35              | 3.49      |
|                        | 75             | 12.36    | 12.46    | 3.82     | 164.31              | 2.19      |
|                        | 100            | 12.39    | 12.39    | 3.91     | 176.47              | 2.04      |
| M=K                    | 0              | 12.57    | 12.60    | 3.88     | 168.93              | 4.97      |
|                        | 25             | 12.56    | 12.55    | 3.87     | 167.39              | 4.34      |
|                        | 50             | 12.57    | 12.59    | 3.89     | 169.17              | 2.03      |
|                        | 75             | 12.52    | 12.53    | 3.86     | 166.98              | 3.80      |
|                        | 100            | 12.43    | 12.43    | 3.92     | 177.00              | 1.73      |
| M=Rb                   | 0              | 12.60    | 12.67    | 3.90     | 169.06              | 3.10      |
|                        | 25             | 12.59    | 12.62    | 3.88     | 167.85              | 4.19      |
|                        | 50             | 12.65    | 12.67    | 3.90     | 169.98              | 1.65      |
|                        | 75             | 12.60    | 12.61    | 3.88     | 167.42              | 4.04      |
|                        | 100            | 12.47    | 12.47    | 3.93     | 177.74              | 1.13      |

Table S8: Tabulated lattice parameters and Nb-O-Nb bond angles (representing tilting) in the c direction for  $R_2MNb_5O_{15}$  materials with compositions with R=Ba and M=Na, K, Rb in the  $P4/mbm$  space group. The standard deviation in Nb-O-Nb corresponds to the averaged standard deviation of Nb-O-Nb angles within a single cell weighted by the probability of the configuration.

| $R=Ba$<br>( $P4/mbm$ ) | R on A1<br>[%] | a<br>[Å] | b<br>[Å] | c<br>[Å] | <Nb-O-Nb (c)<br>[°] | Std. dev. |
|------------------------|----------------|----------|----------|----------|---------------------|-----------|
| M=Na                   | 0.00           | 12.70    | 12.70    | 3.92     | 172.89              | 3.09      |
|                        | 25.00          | 12.68    | 12.67    | 3.91     | 170.55              | 3.35      |
|                        | 50.00          | 12.59    | 12.64    | 3.92     | 171.35              | 4.30      |
|                        | 75.00          | 12.58    | 12.62    | 3.90     | 169.36              | 3.75      |
|                        | 100.00         | 12.53    | 12.53    | 3.94     | 177.22              | 1.39      |
| M=K                    | 0.00           | 12.69    | 12.74    | 3.93     | 172.64              | 2.10      |
|                        | 25.00          | 12.71    | 12.69    | 3.93     | 172.16              | 2.72      |
|                        | 50.00          | 12.68    | 12.65    | 3.93     | 172.67              | 2.95      |
|                        | 75.00          | 12.63    | 12.68    | 3.92     | 171.71              | 2.33      |
|                        | 100.00         | 12.57    | 12.57    | 3.95     | 177.74              | 1.13      |
| M=Rb                   | 0.00           | 12.72    | 12.78    | 3.94     | 172.08              | 1.88      |
|                        | 25.00          | 12.75    | 12.73    | 3.93     | 171.74              | 2.25      |
|                        | 50.00          | 12.70    | 12.75    | 3.93     | 172.35              | 1.15      |
|                        | 75.00          | 12.69    | 12.74    | 3.93     | 171.66              | 1.67      |
|                        | 100.00         | 12.60    | 12.60    | 3.96     | 178.11              | 0.94      |

Table S9: Tabulated lattice parameters and Nb-O-Nb bond angles (representing tilting) in the c direction for  $R_2MNb_5O_{15}$  materials with compositions with R=Ba and M=Na, K, Rb in the  $P4bm$  space group. The standard deviation in Nb-O-Nb corresponds to the averaged standard deviation of Nb-O-Nb angles within a single cell weighted by the probability of the configuration.

| R=Ba<br>( $P4bm$ ) | R on A1<br>[%] | a<br>[Å] | b<br>[Å] | c<br>[Å] | <Nb-O-Nb (c)<br>[°] | Std. dev. |
|--------------------|----------------|----------|----------|----------|---------------------|-----------|
| M=Na               | 0              | 12.61    | 12.61    | 3.98     | 174.17              | 2.16      |
|                    | 25             | 12.61    | 12.60    | 3.95     | 172.22              | 3.34      |
|                    | 50             | 12.54    | 12.55    | 3.95     | 169.22              | 2.85      |
|                    | 75             | 12.45    | 12.47    | 4.00     | 172.43              | 4.28      |
|                    | 100            | 12.46    | 12.46    | 4.03     | 177.98              | 0.71      |
| M=K                | 0              | 12.58    | 12.58    | 4.02     | 176.25              | 0.85      |
|                    | 25             | 12.57    | 12.57    | 4.02     | 176.18              | 1.30      |
|                    | 50             | 12.55    | 12.55    | 4.02     | 176.69              | 1.04      |
|                    | 75             | 12.53    | 12.53    | 4.01     | 174.40              | 1.81      |
|                    | 100            | 12.51    | 12.51    | 4.02     | 178.25              | 0.02      |
| M=Rb               | 0              | 12.63    | 12.64    | 4.01     | 175.26              | 1.29      |
|                    | 25             | 12.61    | 12.62    | 4.01     | 175.17              | 1.75      |
|                    | 50             | 12.59    | 12.60    | 4.02     | 176.08              | 1.65      |
|                    | 75             | 12.58    | 12.58    | 4.02     | 175.08              | 1.69      |
|                    | 100            | 12.54    | 12.54    | 4.04     | 178.65              | 0.67      |

### Phonon Dispersion Spectra of $R_2M\text{Nb}_5\text{O}_{15}$

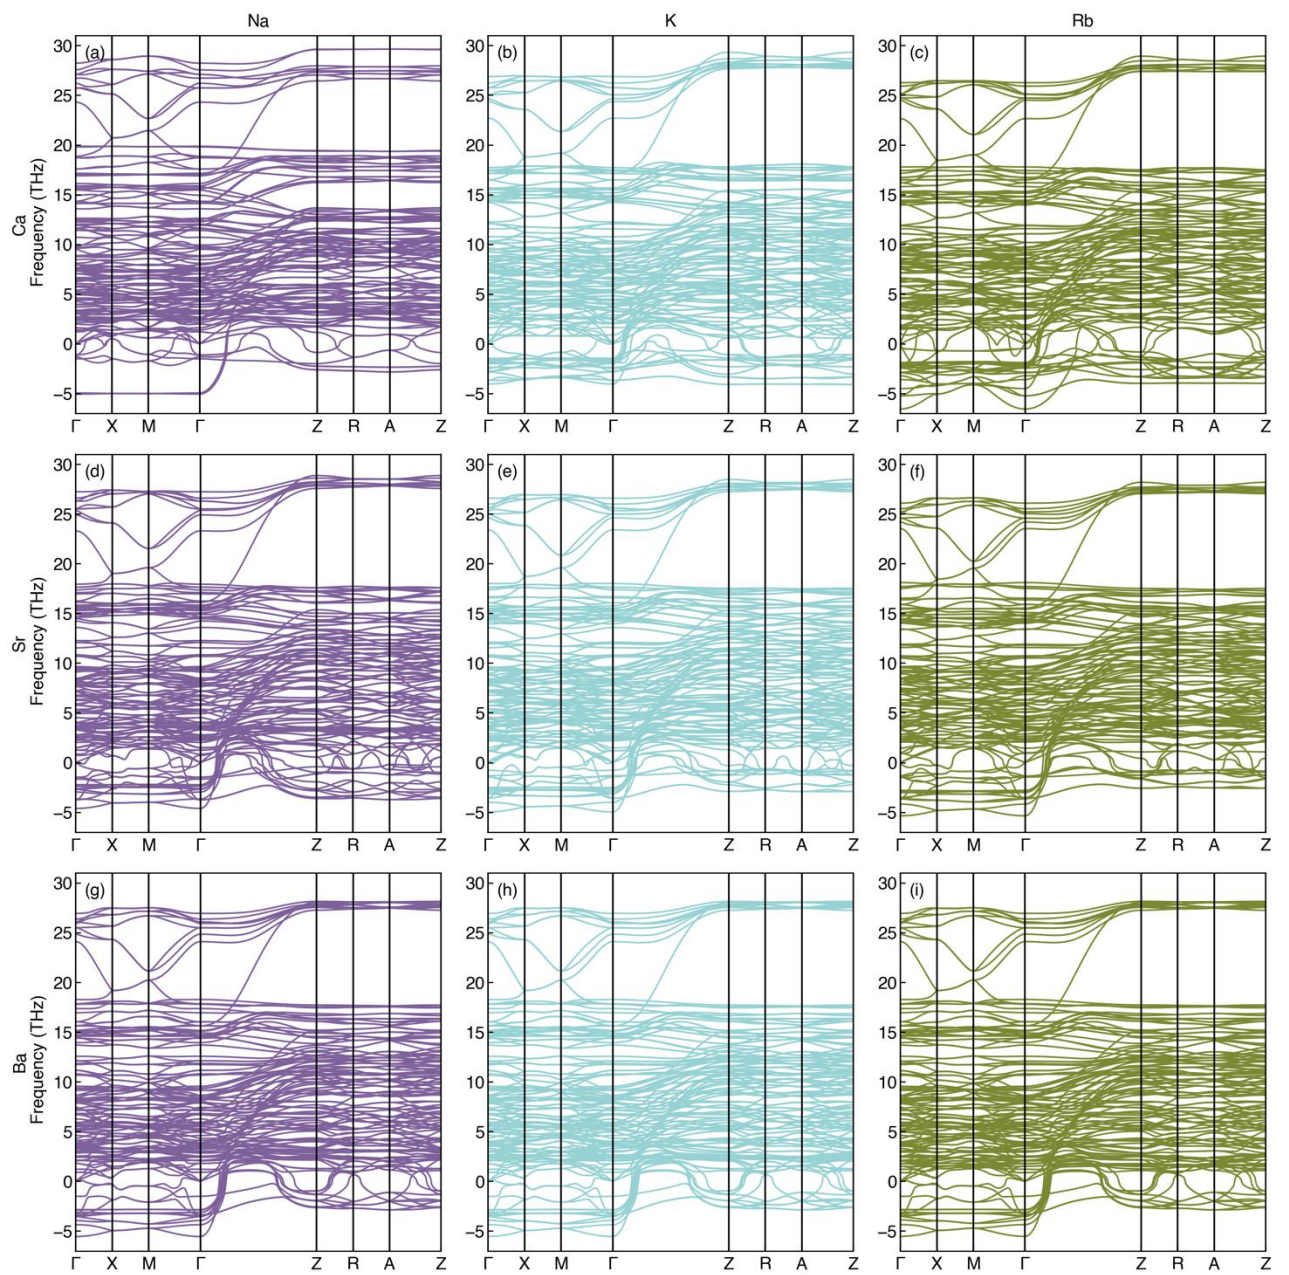

Figure S19: The phonon dispersion spectra for  $R_2M\text{Nb}_5\text{O}_{15}$  in the  $P4/mbm$  space group. (a-c) represent R=Ca, (d-f) R=Sr, (g-i) R=Ba where from left to right is M=Na, K, Rb.



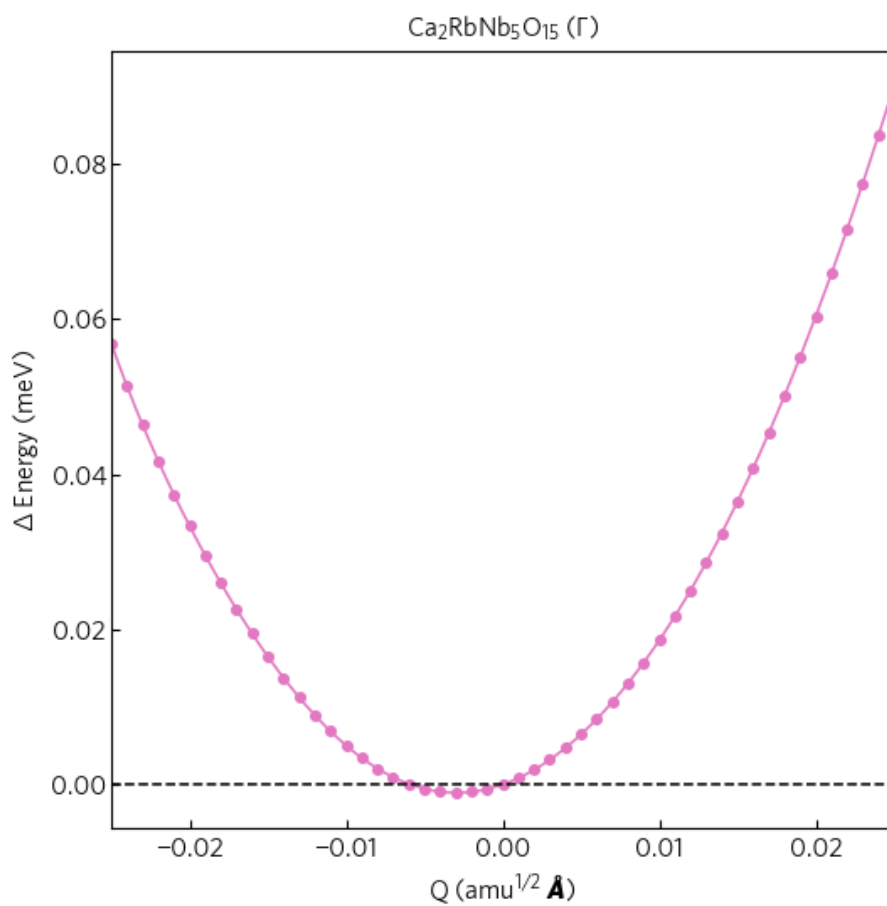

Figure S20: The calculated “mode mapping” of  $\text{Ca}_2\text{RbNb}_5\text{O}_{15}$  at the Gamma point to a much tighter  $Q$  range showing the lack of a double well, yet a slight energy lowering off the starting configuration.

## $\Delta E$ and $\Delta Q$ as a Function of Tolerance Factor

In Figure S, the anharmonic well depths ( $\Delta E$ ) and mode amplitude ( $\Delta Q$ ) at  $\Gamma$  ( $\Delta E$ ) for fully ordered stoichiometric compositions as a function of various TTB tolerance factors are given. The tolerance factors ( $TF_{A2}$  – A2 site tolerance factor,  $TF_{A1}$  – A1 site tolerance factor,  $TF_{TTB}$  – overall TTB tolerance factor) taken from <sup>1,2</sup> and are defined as:

$$TF_{A2} = \frac{R_{A2} + R_O}{\sqrt{23 - 12\sqrt{3}(R_B + R_O)}} \quad (1)$$

$$TF_{A1} = \frac{R_{A1} + R_O}{\sqrt{2}(R_B + R_O)} \quad (2)$$

$$TF_{TTB} = \frac{(TF_{A1} + 2TF_{A2})}{3} \quad (3)$$

Where  $R_{A2}$ ,  $R_{A1}$ ,  $R_B$  and  $R_O$  are the ionic radii for the A2, A1, B, and O site respectively.

In terms of  $\Delta E$ , there is a negative correlation with  $TF_{TTB}$  and  $TF_{A2}$ . Within the A1 site, increasing R cation radii results in a larger  $\Delta E$ .

For  $\Delta Q$ , there is a weak positive correlation with  $TF_{TTB}$  and  $TF_{A2}$ . The A1 site has minimal impact on the mode amplitude, suggesting that the A2 site possesses the most influence over  $\Delta Q$ .

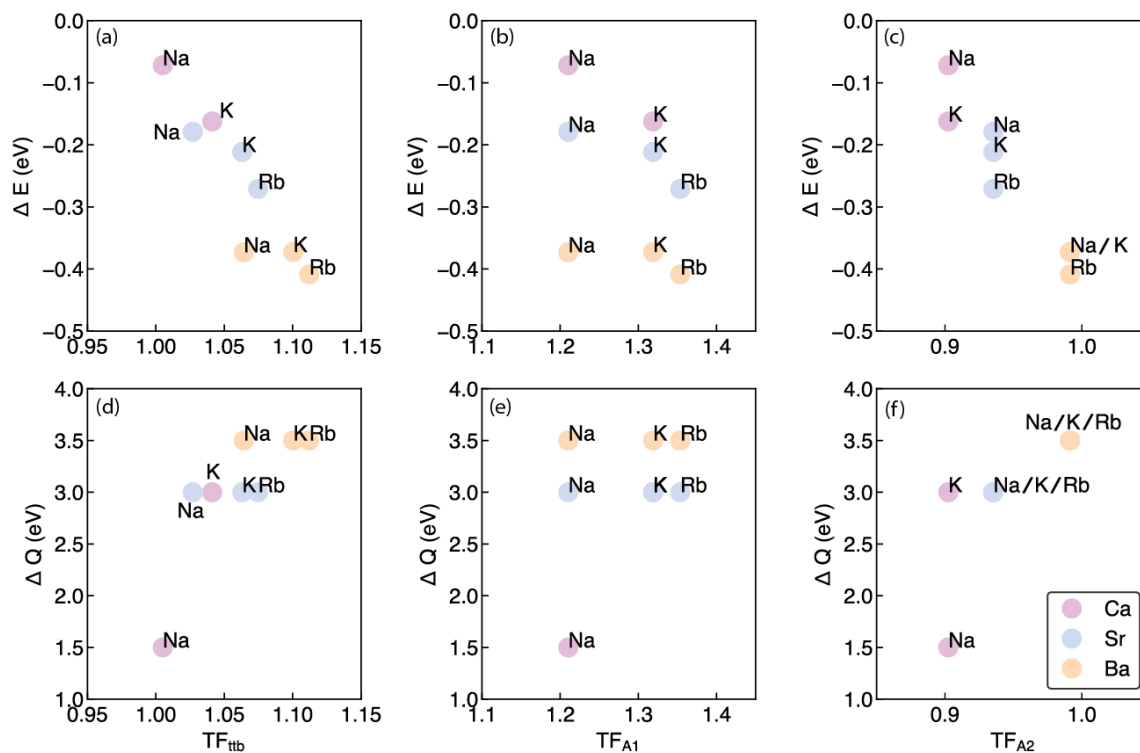

Figure S21: Anharmonic well depth ( $\Delta E$ ) (a-c) and Amplitude ( $\Delta Q$ ) (d-f) at  $\Gamma$  as a function of tolerance factor for (a,d) total, (b,e) A1 site, and (c,f) A2 site

## Thermodynamics of Disorder

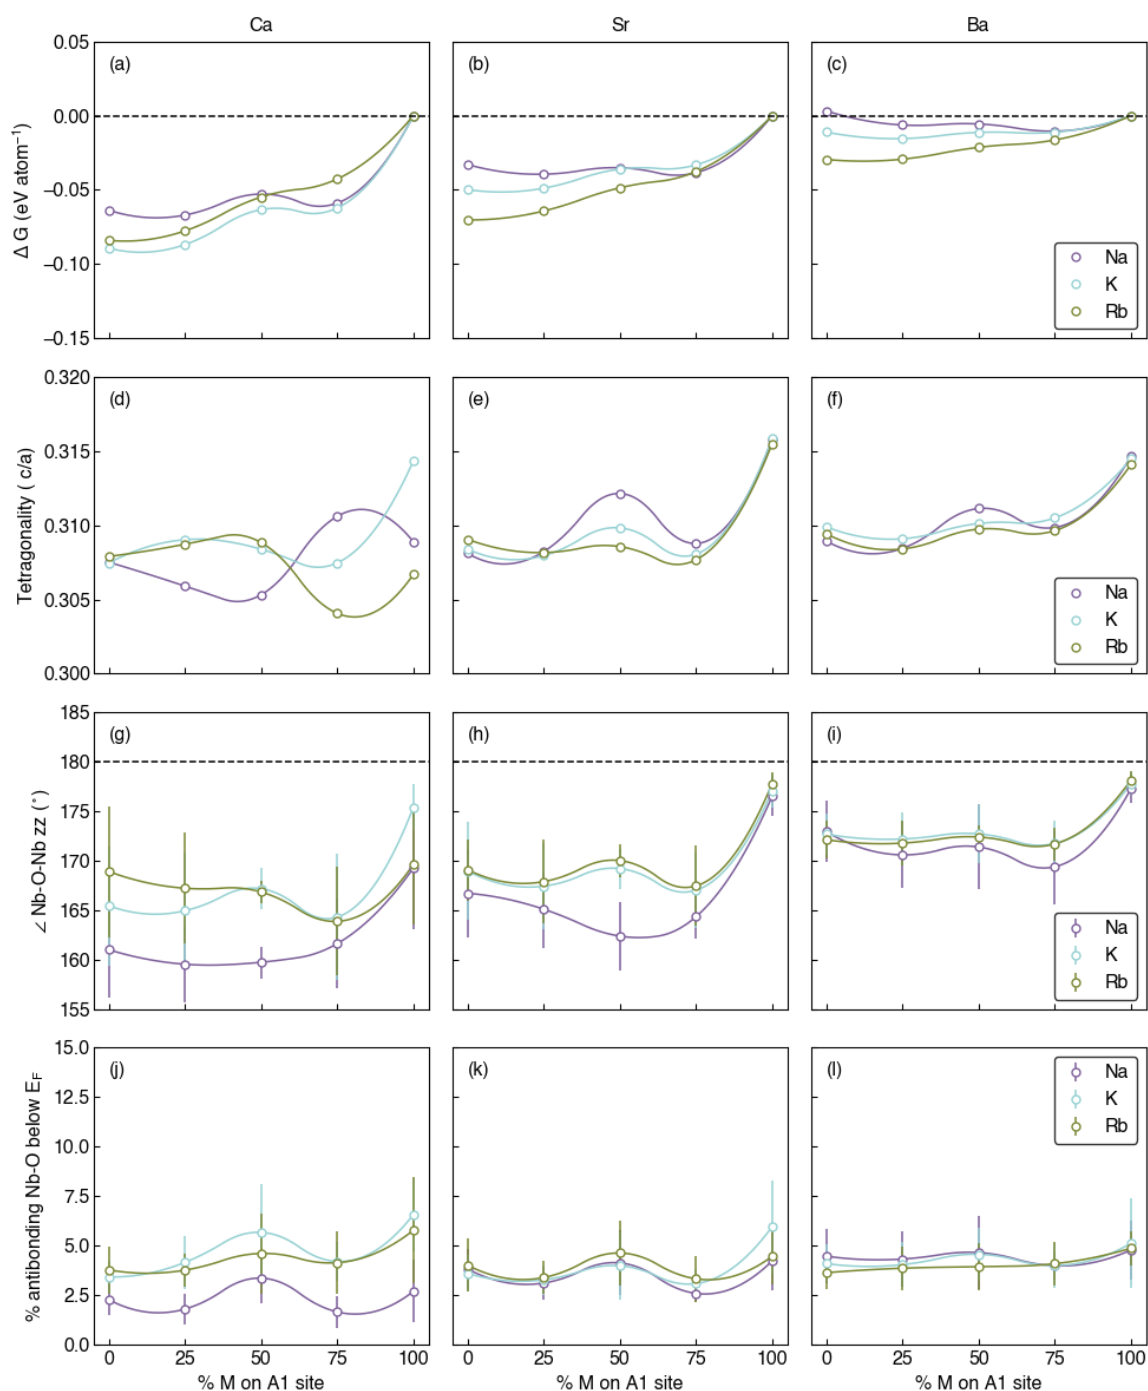

Figure S22: The thermodynamics of cation site disorder as a function of R (Ca, Sr, Ba) and M cation (Na, K, Rb) in  $R_2MNb_5O_{15}$ . In the top row (a,b,c) the Gibbs free energy of configuration is shown relative to the ordered state, the second row (d,e,f) shows the probabilistically averaged tetragonality, the third row (g,h,i) shows the influence of cation site disorder on the Nb-O-Nb bond angle in the c direction inferring octahedral tilting behaviour, and in the bottom row (j,k,l) show the antibonding nature of Nb-O interactions below the Fermi level ( $E_F$ ). The error bars in (g,h,i) are calculated from the standard deviation of  $s$  angle towards all Nb-O-Nb angles in the unit cell, whilst the error bars in (j,k,l) are calculated from the standard deviation between inequivalent configurations.

References:

1. X. Zhu, M. Fu, M. C. Stennett, P. M. Vilarinho, I. Levin, C. A. Randall, J. Gardner, F. D. Morrison and I. M. Reaney, *Chem Mater*, 2015, **27**, 3250-3261.
2. N. Wakiya, J. K. Wang, A. Saiki, K. Shinozaki and N. Mizutani, *J Eur Ceram Soc*, 1999, **19**, 1071-1075.
